# Supplementary material for: Lacticaseibacillus paracasei: Occurrence in the Human Gut Microbiota and K-Mer-Based Assessment of Intraspecies Diversity
Source: MDPI journal article supplement (doi:10.3390/life11111246), 2021-11-17
Supplement: s1 [file s1]

**Supplementary Table S1.** Metagenomes used for taxonomic analysis.

| Project/Accession number                                                                              | Number of reads<br>passed QC | Reference            | Note            |
|-------------------------------------------------------------------------------------------------------|------------------------------|----------------------|-----------------|
| <b>Metagenomes of healthy volunteers and patients with autism</b>                                     |                              |                      |                 |
| PRJEB23052/ERR2608620                                                                                 | 6509332                      | 1, [31] <sup>1</sup> | Healthy         |
| PRJEB23052/ERR2608621                                                                                 | 6315097                      | 1, [31]              | Healthy         |
| PRJEB23052/ERR2608622                                                                                 | 7392754                      | 1, [31]              | Healthy         |
| PRJEB23052/ERR2608623                                                                                 | 5185236                      | 1, [31]              | Healthy         |
| PRJEB23052/ERR2608624                                                                                 | 5163476                      | 1, [31]              | Healthy         |
| PRJEB23052/ERR2608625                                                                                 | 5276922                      | 1, [31]              | Healthy         |
| PRJEB23052/ERR2608626                                                                                 | 5115260                      | 1, [31]              | Healthy         |
| PRJEB23052/ERR2608627                                                                                 | 5091624                      | 1, [31]              | Healthy         |
| PRJEB23052/ERR2608628                                                                                 | 5232997                      | 1, [31]              | Healthy         |
| PRJEB23052/ERR2608629                                                                                 | 6306590                      | 1, [31]              | Healthy         |
| PRJEB23052/ERR2608630                                                                                 | 2636570                      | 1, [31]              | Autism          |
| PRJEB23052/ERR2608631                                                                                 | 3489522                      | 1, [31]              | Autism          |
| PRJEB23052/ERR2608632                                                                                 | 2926848                      | 1, [31]              | Autism          |
| PRJEB23052/ERR2608633                                                                                 | 5531988                      | 1, [31]              | Autism          |
| PRJEB23052/ERR2608634                                                                                 | 1614156                      | 1, [31]              | Autism          |
| PRJEB23052/ERR2608635                                                                                 | 1250119                      | 1, [31]              | Autism          |
| PRJEB23052/ERR2608636                                                                                 | 3774928                      | 1, [31]              | Autism          |
| PRJEB23052/ERR2608637                                                                                 | 3214364                      | 1, [31]              | Autism          |
| PRJEB23052/ERR2608638                                                                                 | 4403534                      | 1, [31]              | Autism          |
| PRJEB23052/ERR2608639                                                                                 | 5728095                      | 1, [31]              | Autism          |
| <b>Metagenomes of healthy volunteers and patients with Chron's disease</b>                            |                              |                      |                 |
| PRJNA290380/SRR3582134                                                                                | 9565987                      | 2, [32]              | Healthy         |
| PRJNA290380/SRR3582142                                                                                | 8037728                      | 2, [32]              | Healthy         |
| PRJNA290380/SRR3582158                                                                                | 12045393                     | 2, [32]              | Healthy         |
| PRJNA290380/SRR3582179                                                                                | 27779132                     | 2, [32]              | Healthy         |
| PRJNA290380/SRR3582131                                                                                | 10553860                     | 2, [32]              | Crohn's disease |
| PRJNA290380/SRR3582133                                                                                | 4045307                      | 2, [32]              | Crohn's disease |
| PRJNA290380/SRR3582135                                                                                | 7422718                      | 2, [32]              | Crohn's disease |
| PRJNA290380/SRR3582143                                                                                | 7981819                      | 2, [32]              | Crohn's disease |
| PRJNA290380/SRR3582147                                                                                | 3056504                      | 2, [32]              | Crohn's disease |
| PRJNA290380/SRR3582151                                                                                | 10715446                     | 2, [32]              | Crohn's disease |
| PRJNA290380/SRR3582153                                                                                | 15284783                     | 2, [32]              | Crohn's disease |
| PRJNA290380/SRR3582154                                                                                | 5964329                      | 2, [32]              | Crohn's disease |
| PRJNA290380/SRR3582159                                                                                | 19754882                     | 2, [32]              | Crohn's disease |
| PRJNA290380/SRR3582163                                                                                | 13839249                     | 2, [32]              | Crohn's disease |
| PRJNA290380/SRR3582166                                                                                | 14180580                     | 2, [32]              | Crohn's disease |
| PRJNA290380/SRR3582168                                                                                | 13243423                     | 2, [32]              | Crohn's disease |
| PRJNA290380/SRR3582173                                                                                | 6585074                      | 2, [32]              | Crohn's disease |
| PRJNA290380/SRR3582175                                                                                | 5246794                      | 2, [32]              | Crohn's disease |
| PRJNA290380/SRR3582180                                                                                | 9365493                      | 2, [32]              | Crohn's disease |
| <b>Metagenomes of obese volunteers before and after adherence to dietary restrictions<sup>2</sup></b> |                              |                      |                 |
| PRJEB33500/ERR3857002                                                                                 | 1959995                      | 3, [33]              | Obesity         |
| PRJEB33500/ERR3857012                                                                                 | 1826406                      |                      | 8 weeks diet    |

---

|                       |         |         |              |
|-----------------------|---------|---------|--------------|
| PRJEB33500/ERR3857254 | 1874205 | 3, [33] | Obesity      |
| PRJEB33500/ERR3857017 | 2229601 |         | 8 weeks diet |
| PRJEB33500/ERR3857037 | 1916084 | 3, [33] | Obesity      |
| PRJEB33500/ERR3857027 | 1497878 |         | 8 weeks diet |
| PRJEB33500/ERR3857100 | 2925880 | 3, [33] | Obesity      |
| PRJEB33500/ERR3857095 | 1871536 |         | 8 weeks diet |
| PRJEB33500/ERR3857146 | 2585136 | 3, [33] | Obesity      |
| PRJEB33500/ERR3857109 | 1759546 |         | 8 weeks diet |
| PRJEB33500/ERR3857205 | 2543813 | 3, [33] | Obesity      |
| PRJEB33500/ERR3857155 | 2212505 |         | 8 weeks diet |
| PRJEB33500/ERR3857215 | 2303995 | 3, [33] | Obesity      |
| PRJEB33500/ERR3857175 | 1528328 |         | 8 weeks diet |
| PRJEB33500/ERR3857170 | 1923341 | 3, [33] | Obesity      |
| PRJEB33500/ERR3857190 | 2278692 |         | 8 weeks diet |
| PRJEB33500/ERR3857279 | 2311426 | 3, [33] | Obesity      |
| PRJEB33500/ERR3857263 | 1540527 |         | 8 weeks diet |
| PRJEB33500/ERR3857305 | 1909621 | 3, [33] | Obesity      |
| PRJEB33500/ERR3857290 | 1594468 |         | 8 weeks diet |
| PRJEB33500/ERR3857350 | 1527538 | 3, [33] | Obesity      |
| PRJEB33500/ERR3857370 | 2698429 |         | 8 weeks diet |
| PRJEB33500/ERR3857380 | 1419732 | 3, [33] | Obesity      |
| PRJEB33500/ERR3857365 | 2182872 |         | 8 weeks diet |
| PRJEB33500/ERR3857423 | 1453389 | 3, [33] | Obesity      |
| PRJEB33500/ERR3857413 | 1812433 |         | 8 weeks diet |
| PRJEB33500/ERR3857532 | 1490011 | 3, [33] | Obesity      |
| PRJEB33500/ERR3857540 | 2367644 |         | 8 weeks diet |
| PRJEB33500/ERR3857586 | 3709986 | 3, [33] | Obesity      |
| PRJEB33500/ERR3857598 | 2029092 |         | 8 weeks diet |
| PRJEB33500/ERR3857642 | 2099219 | 3, [33] | Obesity      |
| PRJEB33500/ERR3857674 | 2292734 |         | 8 weeks diet |
| PRJEB33500/ERR3857795 | 460416  | 3, [33] | Obesity      |
| PRJEB33500/ERR3857803 | 333362  |         | 8 weeks diet |
| PRJEB33500/ERR3857816 | 646093  | 3, [33] | Obesity      |
| PRJEB33500/ERR3857807 | 518009  |         | 8 weeks diet |
| PRJEB33500/ERR3857895 | 2699677 | 3, [33] | Obesity      |
| PRJEB33500/ERR3857969 | 4012580 |         | 8 weeks diet |
| PRJEB33500/ERR3857901 | 4518911 | 3, [33] | Obesity      |
| PRJEB33500/ERR3857947 | 5372218 |         | 8 weeks diet |
| PRJEB33500/ERR3857907 | 3689335 | 3, [33] | Obesity      |
| PRJEB33500/ERR3857905 | 4840823 |         | 8 weeks diet |
| PRJEB33500/ERR3857945 | 3084073 | 3, [33] | Obesity      |
| PRJEB33500/ERR3857954 | 3249622 |         | 8 weeks diet |
| PRJEB33500/ERR3857949 | 3278467 | 3, [33] | Obesity      |
| PRJEB33500/ERR3857960 | 3643305 |         | 8 weeks diet |
| PRJEB33500/ERR3857977 | 3087302 | 3, [33] | Obesity      |
| PRJEB33500/ERR3857975 | 3644496 |         | 8 weeks diet |
| PRJEB33500/ERR3857987 | 4184598 | 3, [33] | Obesity      |
| PRJEB33500/ERR3857989 | 4184598 |         | 8 weeks diet |

**Metagenomes of antibiotic-naïve individuals subjected to sequential antibiotic and probiotic treatment<sup>2</sup>**

---

|                       |         |         |                 |
|-----------------------|---------|---------|-----------------|
| PRJEB28097/ERR2749975 | 538322  |         | Healthy         |
| PRJEB28097/ERR2749984 | 87260   | 4, [34] | Antibiotic      |
| PRJEB28097/ERR2750001 | 425427  |         | Probiotic       |
| PRJEB28097/ERR2750032 | 989767  |         | Healthy         |
| PRJEB28097/ERR2750041 | 284990  | 4, [34] | Antibiotic      |
| PRJEB28097/ERR2750065 | 2058912 |         | Probiotic       |
| PRJEB28097/ERR2750067 | 1119488 |         | Healthy         |
| PRJEB28097/ERR2750080 | 60023   | 4, [34] | Antibiotic      |
| PRJEB28097/ERR2750102 | 1112280 |         | Probiotic       |
| PRJEB28097/ERR2750170 | 1126700 |         | Healthy         |
| PRJEB28097/ERR2750183 | 200757  | 4, [34] | Antibiotic      |
| PRJEB28097/ERR2750192 | 1664514 |         | Probiotic       |
| PRJEB28097/ERR2750195 | 1529932 |         | Healthy         |
| PRJEB28097/ERR2750201 | 558447  | 4, [34] | Antibiotic      |
| PRJEB28097/ERR2750216 | 2210574 |         | Probiotic       |
| PRJEB28097/ERR2750326 | 917099  |         | Healthy         |
| PRJEB28097/ERR2750336 | 617510  | 4, [34] | Antibiotic      |
| PRJEB28097/ERR2750351 | 2787835 |         | SR <sup>3</sup> |
| PRJEB28097/ERR2750353 | 1070291 |         | Healthy         |
| PRJEB28097/ERR2750365 | 188404  | 4, [34] | Antibiotic      |
| PRJEB28097/ERR2750387 | 2724814 |         | SR              |
| PRJEB28097/ERR2750390 | 1129759 |         | Healthy         |
| PRJEB28097/ERR2750403 | 499227  | 4, [34] | Antibiotic      |
| PRJEB28097/ERR2750426 | 2397303 |         | SR              |
| PRJEB28097/ERR2750429 | 738611  |         | Healthy         |
| PRJEB28097/ERR2750440 | 301194  | 4, [34] | Antibiotic      |
| PRJEB28097/ERR2750461 | 104661  |         | SR              |
| PRJEB28097/ERR2750499 | 1083440 |         | Healthy         |
| PRJEB28097/ERR2750509 | 120275  | 4, [34] | Antibiotic      |
| PRJEB28097/ERR2750527 | 2356092 |         | SR              |
| PRJEB28097/ERR2750530 | 954529  |         | Healthy         |
| PRJEB28097/ERR2750542 | 277826  | 4, [34] | Antibiotic      |
| PRJEB28097/ERR2750566 | 1434943 |         | SR              |

<sup>1</sup> Ciphers in the brackets indicate reference number in the main text

<sup>2</sup> Directly compared metagenomes grouped together.

<sup>3</sup> Spontaneously recovered (SR)

#### References used in Supplementary Table S1

1. Wang M. et al. Alterations in Gut Glutamate Metabolism Associated with Changes in Gut Microbiota Composition in Children with Autism Spectrum Disorder // *mSystems*. mSystems, 2019. Vol. 4, № 1.
2. Vaughn B. et al. Increased Intestinal Microbial Diversity Following Fecal Microbiota Transplant for Active Crohn's Disease // *Inflamm. Bowel Dis. Inflamm Bowel Dis*, 2016. Vol. 22, № 9. P. 2182–2190.
3. Meslier V. et al. Mediterranean diet intervention in overweight and obese subjects lowers plasma cholesterol and causes changes in the gut microbiome and metabolome independently of energy intake // *Gut*. Gut, 2020. Vol. 69, № 7. P. 1258–1268.
4. Montassier E. et al. Probiotics impact the antibiotic resistance gene reservoir along the human GI tract in a person-specific and antibiotic-dependent manner // *Nat. Microbiol.* Nat Microbiol, 2021. Vol. 6, № 8. P. 1043–1054.
