# Supplementary material for: Lacticaseibacillus paracasei: Occurrence in the Human Gut Microbiota and K-Mer-Based Assessment of Intraspecies Diversity
Source: MDPI journal article supplement (doi:10.3390/life11111246), 2021-11-17
Supplement: s1 [file s1]

**Table S2.** List including 74 complete genomes of *Lacticaseibacillus* from NCBI GenBank.

| Accession number | Strain                                                    | Genome length, bp | GC-content, % |
|------------------|-----------------------------------------------------------|-------------------|---------------|
| CP031785.1       | <i>L. paracasei</i> 10266                                 | 3012260           | 46.4          |
| CP006690.1       | <i>L. casei</i> 12A                                       | 2907892           | 46.4          |
| CP052065.1       | <i>L. paracasei</i> 347-16                                | 3102350           | 46.3          |
| CP000423.1       | <i>L. paracasei</i> ATCC 334                              | 2895264           | 46.6          |
| CP002618.1       | <i>L. paracasei</i> BD-II                                 | 3069926           | 46.3          |
| FM177140.1       | <i>L. paracasei</i> BL23 (formerly <i>L. casei</i> )      | 3079196           | 46.3          |
| CP048003.1       | <i>L. paracasei</i> CACC 566                              | 3123521           | 46.3          |
| CP012187.1       | <i>L. paracasei</i> CAUH35                                | 2770411           | 46.6          |
| CP041657.1       | <i>L. paracasei</i> CBA3611                               | 3035735           | 46.4          |
| CP029546.1       | <i>L. paracasei</i> EG9                                   | 2927257           | 46.6          |
| CP017261.1       | <i>L. paracasei</i> FAM18149                              | 2710941           | 46.7          |
| CP025582.1       | <i>L. paracasei</i> HD1-7                                 | 3039280           | 46.4          |
| CP026097.1       | <i>L. paracasei</i> HDS-01                                | 3038767           | 46.4          |
| CP014985.1       | <i>L. paracasei</i> IIA                                   | 3055892           | 46.3          |
| AP018392.1       | <i>L. paracasei</i> IJH-SONE68                            | 3084917           | 46.4          |
| CP013921.1       | <i>L. paracasei</i> KL1                                   | 2918888           | 46.6          |
| CP012148.1       | <i>L. paracasei</i> L9                                    | 3076437           | 46.3          |
| CP002616.1       | <i>L. paracasei</i> LC2W                                  | 3039042           | 46.4          |
| CP029536.1       | <i>L. paracasei</i> LC355                                 | 3044973           | 46.5          |
| CP005486.1       | <i>L. paracasei</i> LOCK919                               | 3113601           | 46.2          |
| CP039707.1       | <i>L. paracasei</i> Lp02                                  | 2991176           | 46.3          |
| CP029686.1       | <i>L. paracasei</i> Lpc10                                 | 3052122           | 46.3          |
| LR698988.1       | <i>L. paracasei</i> MGYG-HGUT-02388                       | 3076437           | 46.3          |
| CP007122.1       | <i>L. paracasei</i> N1115                                 | 2938059           | 46.6          |
| CP050500.1       | <i>L. paracasei</i> NFFJ04                                | 2983945           | 46.5          |
| CP041944.1       | <i>L. paracasei</i> NJ                                    | 3083412           | 46.4          |
| CP049324.1       | <i>L. paracasei</i> NSMJ15                                | 2791277           | 46.6          |
| CP035563.1       | <i>L. paracasei</i> SRCM103299                            | 3081420           | 46.4          |
| CP045567.1       | <i>L. paracasei</i> TK-P4A                                | 3020185           | 46.4          |
| CP001084.2       | <i>L. paracasei</i> Zhang                                 | 2861969           | 46.5          |
| CP002391.1       | <i>L. paracasei</i> subsp. <i>paracasei</i> 8700:2        | 2939026           | 46.4          |
| CP022954.1       | <i>L. paracasei</i> subsp. <i>paracasei</i> IBB3423       | 3183386           | 46.3          |
| AP012541.1       | <i>L. paracasei</i> subsp. <i>paracasei</i> JCM 8130      | 2995875           | 46.6          |
| CP016355.1       | <i>L. paracasei</i> subsp. <i>paracasei</i> TMW 1-1434    | 3063698           | 46.4          |
| CP025499.1       | <i>L. paracasei</i> subsp. <i>tolerans</i> AO356 (7112-2) | 3022095           | 46.4          |
| CP064299.1       | <i>L. paracasei</i> subsp. <i>tolerans</i> MGB0245        | 3042298           | 46.4          |
| CP064311.1       | <i>L. paracasei</i> subsp. <i>tolerans</i> MGB0625        | 3202250           | 46.3          |
| CP064304.1       | <i>L. paracasei</i> subsp. <i>tolerans</i> MGB0734        | 3079306           | 46.4          |
| CP064314.1       | <i>L. paracasei</i> subsp. <i>tolerans</i> MGB0747        | 3071809           | 46.3          |
| CP064316.1       | <i>L. paracasei</i> subsp. <i>tolerans</i> MGB0761        | 3086705           | 46.3          |
| CP065154.1       | <i>L. paracasei</i> subsp. <i>tolerans</i> ZY-1           | 3148894           | 46.4          |
| CP038153.1       | <i>L. paracasei</i> TCS                                   | 3077701           | 46.3          |
| CP044361.1       | <i>L. paracasei</i> TD 062                                | 2667255           | 46.7          |
| CP017716.1       | <i>L. paracasei</i> TK1501                                | 2942538           | 46.5          |
| HE970764.1       | <i>L. paracasei</i> W56 (formerly <i>L. casei</i> )       | 3075780           | 46.3          |
| CP032637.1       | <i>L. paracasei</i> ZFM54                                 | 3015887           | 46.4          |
| CP017065.1       | <i>L. casei</i> LC5                                       | 3132867           | 47.9          |
| AP012544.1       | <i>L. casei</i> subsp. <i>casei</i> ATCC 393              | 2924929           | 47.9          |
| LS991421.1       | <i>L. zeae</i> CECT 9104 (formerly <i>L. casei</i> )      | 3045762           | 48.0          |

|            |                                  |         |      |
|------------|----------------------------------|---------|------|
| CP045068.1 | <i>L. manihotivorans</i> LM010   | 3395916 | 47.8 |
| CP040780.1 | <i>L. rhamnosus</i> 1-0320       | 2941522 | 46.7 |
| CP021426.1 | <i>L. rhamnosus</i> 4B15         | 3047840 | 46.6 |
| CP014645.1 | <i>L. rhamnosus</i> ASCC 290     | 2903890 | 46.7 |
| CP022109.1 | <i>L. rhamnosus</i> ATCC 11443   | 2990082 | 46.8 |
| CP003094.1 | <i>L. rhamnosus</i> ATCC 8530    | 2960339 | 46.8 |
| CP014201.1 | <i>L. rhamnosus</i> BFE5264      | 3068152 | 46.8 |
| CP046267.1 | <i>L. rhamnosus</i> BIO5326      | 2989570 | 46.8 |
| CP044506.1 | <i>L. rhamnosus</i> BIO6870      | 3006715 | 46.7 |
| LT220504.1 | <i>L. rhamnosus</i> BPL5         | 3024027 | 46.7 |
| CP006804.1 | <i>L. rhamnosus</i> DSM 14870    | 3013149 | 46.7 |
| CP031290.1 | <i>L. rhamnosus</i> GG           | 3010116 | 46.7 |
| CP044228.1 | <i>L. rhamnosus</i> hsryfm 1301  | 3022021 | 46.8 |
| CP045531.1 | <i>L. rhamnosus</i> IDCC 3201    | 3064363 | 46.7 |
| FM179323.1 | <i>L. rhamnosus</i> Lc 705       | 2968598 | 46.7 |
| CP005484.1 | <i>L. rhamnosus</i> LOCK900      | 2883376 | 46.8 |
| CP005485.1 | <i>L. rhamnosus</i> LOCK908      | 2990900 | 46.8 |
| CP017063.1 | <i>L. rhamnosus</i> LR5          | 2972590 | 46.7 |
| CP016823.1 | <i>L. rhamnosus</i> LRB          | 2934954 | 46.8 |
| CP025428.1 | <i>L. rhamnosus</i> LR-B1        | 3007503 | 46.7 |
| LR134322.1 | <i>L. rhamnosus</i> NCTC13710    | 2991048 | 46.8 |
| LR134331.1 | <i>L. rhamnosus</i> NCTC13764    | 2988387 | 46.8 |
| CP020464.1 | <i>L. rhamnosus</i> Pen          | 2884966 | 46.8 |
| CP019305.1 | <i>L. rhamnosus</i> SCT-10-10-60 | 2990071 | 46.8 |
| CP020016.1 | <i>L. rhamnosus</i> WQ2          | 2960737 | 45.9 |

---
