# Supplementary material for: Lacticaseibacillus paracasei: Occurrence in the Human Gut Microbiota and K-Mer-Based Assessment of Intraspecies Diversity
Source: MDPI journal article supplement (doi:10.3390/life11111246), 2021-11-17
Supplement: s1 [file s1]

**Table S3.** List of 175 additional *L. paracasei* genomes from NCBI GenBank (assembled in contigs and scaffolds) used for intraspecific phylogenetic analysis.

|    | Accession number | Strain                                        |
|----|------------------|-----------------------------------------------|
| 1  | JADNKT010000000  | <i>L. paracasei</i> 1001095A_150126_G7        |
| 2  | JADMSR010000000  | <i>L. paracasei</i> 1001095IJ_161003_H4       |
| 3  | JADNFJ010000000  | <i>L. paracasei</i> 1001099B_141217_B4        |
| 4  | JADMOS010000000  | <i>L. paracasei</i> 1001217B_150727_F3        |
| 5  | JADOAX010000000  | <i>L. paracasei</i> 1001270B_150601_G2        |
| 6  | JADNCF010000000  | <i>L. paracasei</i> 1001295B_180824_D1        |
| 7  | JADOAW010000000  | <i>L. paracasei</i> 1001713B170131_170501_F11 |
| 8  | JVUB01000000     | <i>L. paracasei</i> 1316.rep1                 |
| 9  | JAFEHM010000000  | <i>L. paracasei</i> 2306                      |
| 10 | JAFEHK010000000  | <i>L. paracasei</i> 2333                      |
| 11 | JVNI01000000     | <i>L. paracasei</i> 275                       |
| 12 | AFYL01000000     | <i>L. paracasei</i> 32G                       |
| 13 | JAFEHL010000000  | <i>L. paracasei</i> 4186                      |
| 14 | JVDQ01000000     | <i>L. paracasei</i> 525                       |
| 15 | AUYM01000000     | <i>L. paracasei</i> 5b                        |
| 16 | JUQW01000000     | <i>L. paracasei</i> 844                       |
| 17 | JAHLXM010000000  | <i>L. paracasei</i> ABK                       |
| 18 | QVHW01000000     | <i>L. paracasei</i> AM33-2AC                  |
| 19 | NXET01000000     | <i>L. paracasei</i> B2                        |
| 20 | NXES01000000     | <i>L. paracasei</i> B3                        |
| 21 | WBNY01000000     | <i>L. paracasei</i> BIO5452                   |
| 22 | WKPH01000000     | <i>L. paracasei</i> BIOML-A1                  |
| 23 | WKPG01000000     | <i>L. paracasei</i> BIOML-A2                  |
| 24 | WKPF01000000     | <i>L. paracasei</i> BIOML-A3                  |
| 25 | WKPE01000000     | <i>L. paracasei</i> BIOML-A4                  |
| 26 | LTDP01000000     | <i>L. paracasei</i> BM-LC14617                |
| 27 | LGIY01000000     | <i>L. paracasei</i> CCC B1205                 |
| 28 | JAIPUN010000000  | <i>L. paracasei</i> cek-R2                    |
| 29 | RCYL01000000     | <i>L. paracasei</i> co_0103                   |
| 30 | BAGT01000000     | <i>L. paracasei</i> COM0101                   |
| 31 | AFYN01000000     | <i>L. paracasei</i> CRF28                     |
| 32 | JAAFGQ010000000  | <i>L. paracasei</i> D10-4                     |
| 33 | JAACXY010000000  | <i>L. paracasei</i> D3-5                      |
| 34 | JAERKI010000000  | <i>L. paracasei</i> Dm-2019-60                |
| 35 | NDXH01000000     | <i>L. paracasei</i> DmW_181                   |
| 36 | VLHQ01000000     | <i>L. paracasei</i> DPC 7150                  |
| 37 | NCSN01000000     | <i>L. paracasei</i> DPC2071                   |
| 38 | NCSO01000000     | <i>L. paracasei</i> DPC4206                   |
| 39 | NCSP01000000     | <i>L. paracasei</i> DPC4536                   |
| 40 | LNQD01000000     | <i>L. paracasei</i> DPC6800                   |
| 41 | JYBD01000000     | <i>L. paracasei</i> DSM 20207                 |
| 42 | WUJH01000000     | <i>L. paracasei</i> DTA72                     |
| 43 | JAAVWK010000000  | <i>L. paracasei</i> DTA81                     |
| 44 | QRBH01000000     | <i>L. paracasei</i> DTA83                     |
| 45 | VTYT01000000     | <i>L. paracasei</i> DTA93                     |
| 46 | PKQJ01000000     | <i>L. paracasei</i> DUP 13076                 |
| 47 | CAJJVN010000000  | <i>L. paracasei</i> ERR747982-bin.4           |
| 48 | LKFC01000000     | <i>L. paracasei</i> FAM10859                  |
| 49 | LKFD01000000     | <i>L. paracasei</i> FAM18099                  |

|     |                 |                                                  |
|-----|-----------------|--------------------------------------------------|
| 50  | LKFE01000000    | <i>L. paracasei</i> FAM18101                     |
| 51  | LKFF01000000    | <i>L. paracasei</i> FAM18105                     |
| 52  | LKFG01000000    | <i>L. paracasei</i> FAM18108                     |
| 53  | LKFH01000000    | <i>L. paracasei</i> FAM18110                     |
| 54  | LKFI01000000    | <i>L. paracasei</i> FAM18113                     |
| 55  | LKFJ01000000    | <i>L. paracasei</i> FAM18119                     |
| 56  | LKFK01000000    | <i>L. paracasei</i> FAM18121                     |
| 57  | LKFL01000000    | <i>L. paracasei</i> FAM18123                     |
| 58  | LKFM01000000    | <i>L. paracasei</i> FAM18124                     |
| 59  | LKFN01000000    | <i>L. paracasei</i> FAM18126                     |
| 60  | LKFO01000000    | <i>L. paracasei</i> FAM18129                     |
| 61  | LKFP01000000    | <i>L. paracasei</i> FAM18132                     |
| 62  | LKFQ01000000    | <i>L. paracasei</i> FAM18133                     |
| 63  | LKFS01000000    | <i>L. paracasei</i> FAM18157                     |
| 64  | LKFT01000000    | <i>L. paracasei</i> FAM18168                     |
| 65  | LKFU01000000    | <i>L. paracasei</i> FAM18172                     |
| 66  | LKJV01000000    | <i>L. paracasei</i> FAM18175                     |
| 67  | LKFW01000000    | <i>L. paracasei</i> FAM19317                     |
| 68  | LKFX01000000    | <i>L. paracasei</i> FAM19353                     |
| 69  | LKFY01000000    | <i>L. paracasei</i> FAM19404                     |
| 70  | LKFZ01000000    | <i>L. paracasei</i> FAM22276                     |
| 71  | LKGA01000000    | <i>L. paracasei</i> FAM22277                     |
| 72  | LKGB01000000    | <i>L. paracasei</i> FAM22278                     |
| 73  | LKGC01000000    | <i>L. paracasei</i> FAM22279                     |
| 74  | LKGD01000000    | <i>L. paracasei</i> FAM22280                     |
| 75  | LKGE01000000    | <i>L. paracasei</i> FAM3228                      |
| 76  | LKGF01000000    | <i>L. paracasei</i> FAM3248                      |
| 77  | LKGG01000000    | <i>L. paracasei</i> FAM3257                      |
| 78  | LKGH01000000    | <i>L. paracasei</i> FAM4067                      |
| 79  | LKGI01000000    | <i>L. paracasei</i> FAM6012                      |
| 80  | LKGJ01000000    | <i>L. paracasei</i> FAM6161                      |
| 81  | LKGK01000000    | <i>L. paracasei</i> FAM6165                      |
| 82  | LKGL01000000    | <i>L. paracasei</i> FAM6410                      |
| 83  | LKGM01000000    | <i>L. paracasei</i> FAM7821                      |
| 84  | LKGN01000000    | <i>L. paracasei</i> FAM8140                      |
| 85  | LKGO01000000    | <i>L. paracasei</i> FAM8374                      |
| 86  | LKGP01000000    | <i>L. paracasei</i> FAM8407                      |
| 87  | MOAG01000000    | <i>L. paracasei</i> HZ-1                         |
| 88  | CAJHQN010000000 | <i>L. paracasei</i> IBR071                       |
| 89  | JXRL01000000    | <i>L. paracasei</i> INF 10                       |
| 90  | JXRJ01000000    | <i>L. paracasei</i> INF 448                      |
| 91  | JXRK01000000    | <i>L. paracasei</i> INF 456                      |
| 92  | CABFNE010000000 | <i>L. paracasei</i> INIA P272                    |
| 93  | QHBM01000000    | <i>L. paracasei</i> JS1                          |
| 94  | QMJP01000000    | <i>L. paracasei</i> KMB_616                      |
| 95  | QMJV01000000    | <i>L. paracasei</i> KMB_622                      |
| 96  | QM JW01000000   | <i>L. paracasei</i> KMB_623                      |
| 97  | JAGZXG010000000 | <i>L. paracasei</i> L2_013_015G1_dasL2_013_015G1 |
| 98  | SEMI01000000    | <i>L. paracasei</i> L32                          |
| 99  | MBTZ01000000    | <i>L. paracasei</i> L9D                          |
| 100 | VTDA01000000    | <i>L. paracasei</i> LactoQK                      |
| 101 | JAIFOL010000000 | <i>L. paracasei</i> LB113R                       |
| 102 | JPKN03000000    | <i>L. paracasei</i> Lbs2                         |

|     |                |                                                           |
|-----|----------------|-----------------------------------------------------------|
| 103 | AFYT01000000   | <i>L. paracasei</i> Lc-10                                 |
| 104 | LDEJ01000000   | <i>L. paracasei</i> Lc1542                                |
| 105 | BDIT01000000   | <i>L. paracasei</i> LC-Ikematsu                           |
| 106 | NIGW01000000   | <i>L. paracasei</i> LMG S-29188                           |
| 107 | NOKL01000000   | <i>L. paracasei</i> Lpc-37                                |
| 108 | AFYO01000000   | <i>L. paracasei</i> M36                                   |
| 109 | JAHLXL01000000 | <i>L. paracasei</i> MA2                                   |
| 110 | JAHHQA01000000 | <i>L. paracasei</i> MYD3                                  |
| 111 | JAHL0K01000000 | <i>L. paracasei</i> N53                                   |
| 112 | BAYM01000000   | <i>L. paracasei</i> NRIC 0644                             |
| 113 | BAYN01000000   | <i>L. paracasei</i> NRIC 1917                             |
| 114 | BAYO01000000   | <i>L. paracasei</i> NRIC 1981                             |
| 115 | MKFZ01000000   | <i>L. paracasei</i> RI-194                                |
| 116 | MKGA01000000   | <i>L. paracasei</i> RI-195                                |
| 117 | MKFY01000000   | <i>L. paracasei</i> RI-210                                |
| 118 | JACEIM01000000 | <i>L. paracasei</i> s-16                                  |
| 119 | SUMT01000000   | <i>L. paracasei</i> S49                                   |
| 120 | VCMK01000000   | <i>L. paracasei</i> SA5                                   |
| 121 | SCEM01000000   | <i>L. paracasei</i> SRCM103410                            |
| 122 | SCEO01000000   | <i>L. paracasei</i> SRCM103424                            |
| 123 | JAAXZG01000000 | <i>L. paracasei</i> subsp. <i>paracasei</i> AS01afH2WH_17 |
| 124 | ANLE01000000   | <i>L. paracasei</i> subsp. <i>paracasei</i> CNCM I-2877   |
| 125 | ANJX01000000   | <i>L. paracasei</i> subsp. <i>paracasei</i> CNCM I-4270   |
| 126 | ANKL01000000   | <i>L. paracasei</i> subsp. <i>paracasei</i> CNCM I-4648   |
| 127 | ANKH01000000   | <i>L. paracasei</i> subsp. <i>paracasei</i> CNCM I-4649   |
| 128 | WBOW01000000   | <i>L. paracasei</i> subsp. <i>paracasei</i> K114          |
| 129 | QMJF01000000   | <i>L. paracasei</i> subsp. <i>paracasei</i> KMB_598       |
| 130 | ANMK01000000   | <i>L. paracasei</i> subsp. <i>paracasei</i> Lpp120        |
| 131 | ANKW01000000   | <i>L. paracasei</i> subsp. <i>paracasei</i> Lpp122        |
| 132 | ANJW01000000   | <i>L. paracasei</i> subsp. <i>paracasei</i> Lpp123        |
| 133 | ANKM01000000   | <i>L. paracasei</i> subsp. <i>paracasei</i> Lpp125        |
| 134 | ANKC01000000   | <i>L. paracasei</i> subsp. <i>paracasei</i> Lpp126        |
| 135 | ANJZ01000000   | <i>L. paracasei</i> subsp. <i>paracasei</i> Lpp14         |
| 136 | ANMH01000000   | <i>L. paracasei</i> subsp. <i>paracasei</i> Lpp17         |
| 137 | ANJY01000000   | <i>L. paracasei</i> subsp. <i>paracasei</i> Lpp189        |
| 138 | ANJS01000000   | <i>L. paracasei</i> subsp. <i>paracasei</i> Lpp219        |
| 139 | ANMI01000000   | <i>L. paracasei</i> subsp. <i>paracasei</i> Lpp22         |
| 140 | ANKF01000000   | <i>L. paracasei</i> subsp. <i>paracasei</i> Lpp221        |
| 141 | ANML01000000   | <i>L. paracasei</i> subsp. <i>paracasei</i> Lpp223        |
| 142 | ANMM01000000   | <i>L. paracasei</i> subsp. <i>paracasei</i> Lpp225        |
| 143 | ANMN01000000   | <i>L. paracasei</i> subsp. <i>paracasei</i> Lpp226        |
| 144 | ANKK01000000   | <i>L. paracasei</i> subsp. <i>paracasei</i> Lpp227        |
| 145 | ANKA01000000   | <i>L. paracasei</i> subsp. <i>paracasei</i> Lpp228        |
| 146 | ANJT01000000   | <i>L. paracasei</i> subsp. <i>paracasei</i> Lpp229        |
| 147 | ANKY01000000   | <i>L. paracasei</i> subsp. <i>paracasei</i> Lpp230        |
| 148 | ANKG01000000   | <i>L. paracasei</i> subsp. <i>paracasei</i> Lpp37         |
| 149 | ANKE01000000   | <i>L. paracasei</i> subsp. <i>paracasei</i> Lpp4          |
| 150 | ANKI01000000   | <i>L. paracasei</i> subsp. <i>paracasei</i> Lpp43         |
| 151 | ANMJ01000000   | <i>L. paracasei</i> subsp. <i>paracasei</i> Lpp46         |
| 152 | ANLG01000000   | <i>L. paracasei</i> subsp. <i>paracasei</i> Lpp48         |
| 153 | ANKJ01000000   | <i>L. paracasei</i> subsp. <i>paracasei</i> Lpp49         |
| 154 | ANJV01000000   | <i>L. paracasei</i> subsp. <i>paracasei</i> Lpp7          |
| 155 | ANLF01000000   | <i>L. paracasei</i> subsp. <i>paracasei</i> Lpp70         |

|     |                 |                                                        |
|-----|-----------------|--------------------------------------------------------|
| 156 | ANKD01000000    | <i>L. paracasei</i> subsp. <i>paracasei</i> Lpp71      |
| 157 | ANJU01000000    | <i>L. paracasei</i> subsp. <i>paracasei</i> Lpp74      |
| 158 | BJVL01000000    | <i>L. paracasei</i> subsp. <i>paracasei</i> NBRC 15889 |
| 159 | NPOB02000000    | <i>L. paracasei</i> subsp. <i>paracasei</i> NTU 101    |
| 160 | AYYJ01000000    | <i>L. paracasei</i> subsp. <i>tolerans</i> DSM 20258   |
| 161 | ANKB01000000    | <i>L. paracasei</i> subsp. <i>tolerans</i> Lpl14       |
| 162 | ANKV01000000    | <i>L. paracasei</i> subsp. <i>tolerans</i> Lpl7        |
| 163 | JADIXQ010000000 | <i>L. paracasei</i> subsp. <i>tolerans</i> MGB0543     |
| 164 | BJVO01000000    | <i>L. paracasei</i> subsp. <i>tolerans</i> NBRC 15906  |
| 165 | AFYP01000000    | <i>L. paracasei</i> T71499                             |
| 166 | QXET01000000    | <i>L. paracasei</i> TJB4                               |
| 167 | RCFI01000000    | <i>L. paracasei</i> UBLPC-35                           |
| 168 | JADDXY010000000 | <i>L. paracasei</i> UBLPC-87                           |
| 169 | AFYQ01000000    | <i>L. paracasei</i> UCD174                             |
| 170 | AFYR01000000    | <i>L. paracasei</i> UW1                                |
| 171 | AQVS01000000    | <i>L. paracasei</i> UW4                                |
| 172 | JAAJBK010000000 | <i>L. paracasei</i> VA02-1AN                           |
| 173 | MWVE01000000    | <i>L. paracasei</i> W14                                |
| 174 | MWVD01000000    | <i>L. paracasei</i> W16                                |
| 175 | JAFELK010000000 | <i>L. paracasei</i> YT170                              |

---
