# Supplementary material for: Lacticaseibacillus paracasei: Occurrence in the Human Gut Microbiota and K-Mer-Based Assessment of Intraspecies Diversity
Source: Life (Basel). 2021 Nov 17;11(11):1246. doi: 10.3390/life11111246 (PMC8620312; doi:10.3390/life11111246)
Supplement: Supplementary file 1 [file life-11-01246-s001.zip]

Archive with 4 entries (4 files):
- Supplementary Figure 1.pdf
- Supplementary Table 1.pdf
- Supplementary Table 2.pdf
- Supplementary Table 3.pdf
